# Supplementary material
Source: PubMed Central journal article supplement (PMC10203969)
Supplement: jamapediatr-e231440-s002.pdf [file jamapediatr-e231440-s002.pdf]

## Data Sharing Statement

Hu. Safety of the BNT162b2 (Pfizer-BioNTech) COVID-19 Vaccine in Children Aged 5 to 17 Years. *JAMA Pediatr.* Published May 22, 2023. doi:10.1001/jamapediatrics.2023.1440

### Data

**Data available:** No

### Additional Information

**Explanation for why data not available:** FDA receives aggregate data of results from directed analyses and the original patient level claims data are retained by health plans to preserve individual patient privacy. We can share aggregated results information on fields in the data set if requested.
